# Supplementary material for: Demographics Matter: Non-white and White Life Science Graduate Students Perceive and Use Resources Differently
Source: Atypon-hosted journal article supplement (doi:10.1187/cbe.22-06-0112), 2022-10-18
Supplement: combinedsupmats.pdf [file combinedsupmats.pdf]

Supplemental Material

*CBE—Life Sciences Education*

Weatherton *et al.*

Demographics matter: Nonwhite and white life science graduate students perceive and use resources differently – Supplemental Material

Supplemental Material – Demographics matter: Nonwhite and white life science graduate students perceive and use resources differently

Maryrose Weatherton & Elisabeth E. Schussler  
Department of Ecology and Evolutionary Biology, The University of Tennessee

Page 2 – Supplementary Figure 1: Map of universities surveyed, plotted using Google Maps

Page 3 – Supplementary Figure 2: Scatterplot of resource frequency of use by perception of resource usefulness

Page 3-6 – List of 107 universities surveyed

Pages 6-7 – List of unique resources written-in by survey participants

Pages 8-14 – Descriptive statistics – Perception of resource usefulness

Pages 15-21 – Descriptive statistics – Frequency of resource use

Additional excel sheet: Descriptive statistics and raw data for nonbinary student responses (i.e., agender and genderqueer students)

Demographics matter: Nonwhite and white life science graduate students perceive and use resources differently – Supplemental Material

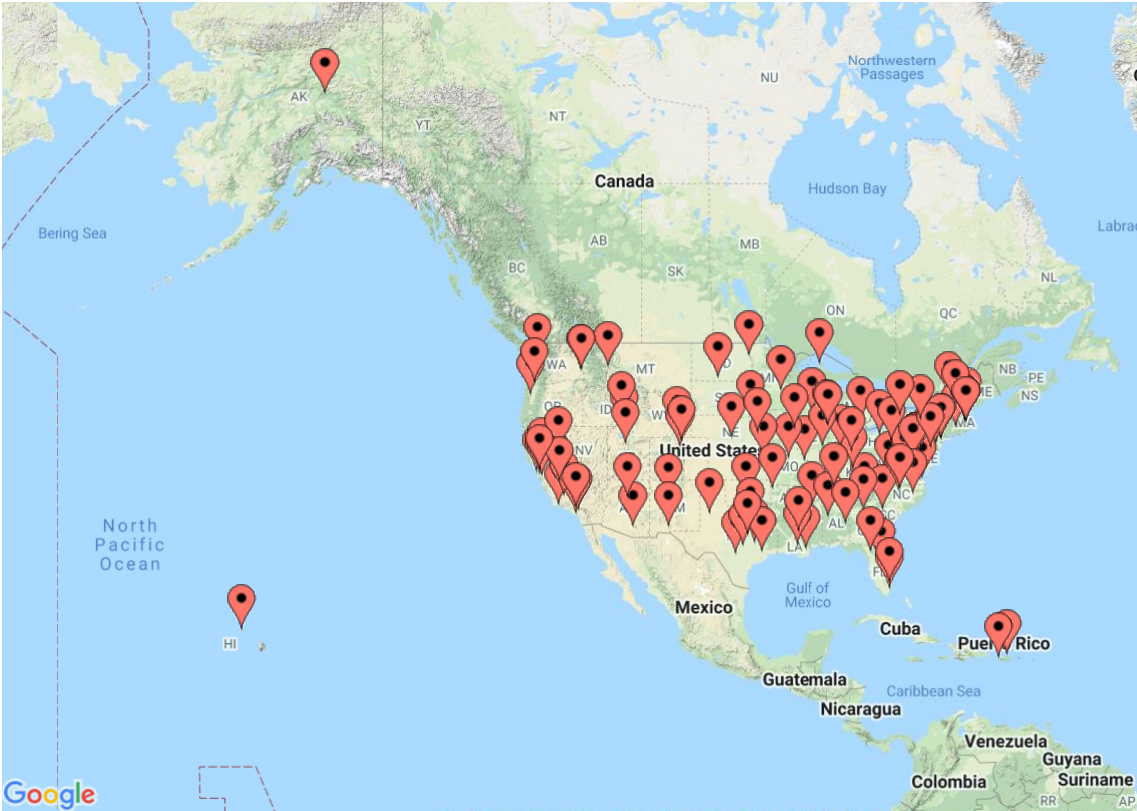

Supplementary Figure 1: Map of universities surveyed, plotted using Google Maps

Demographics matter: Nonwhite and white life science graduate students perceive and use resources differently – Supplemental Material

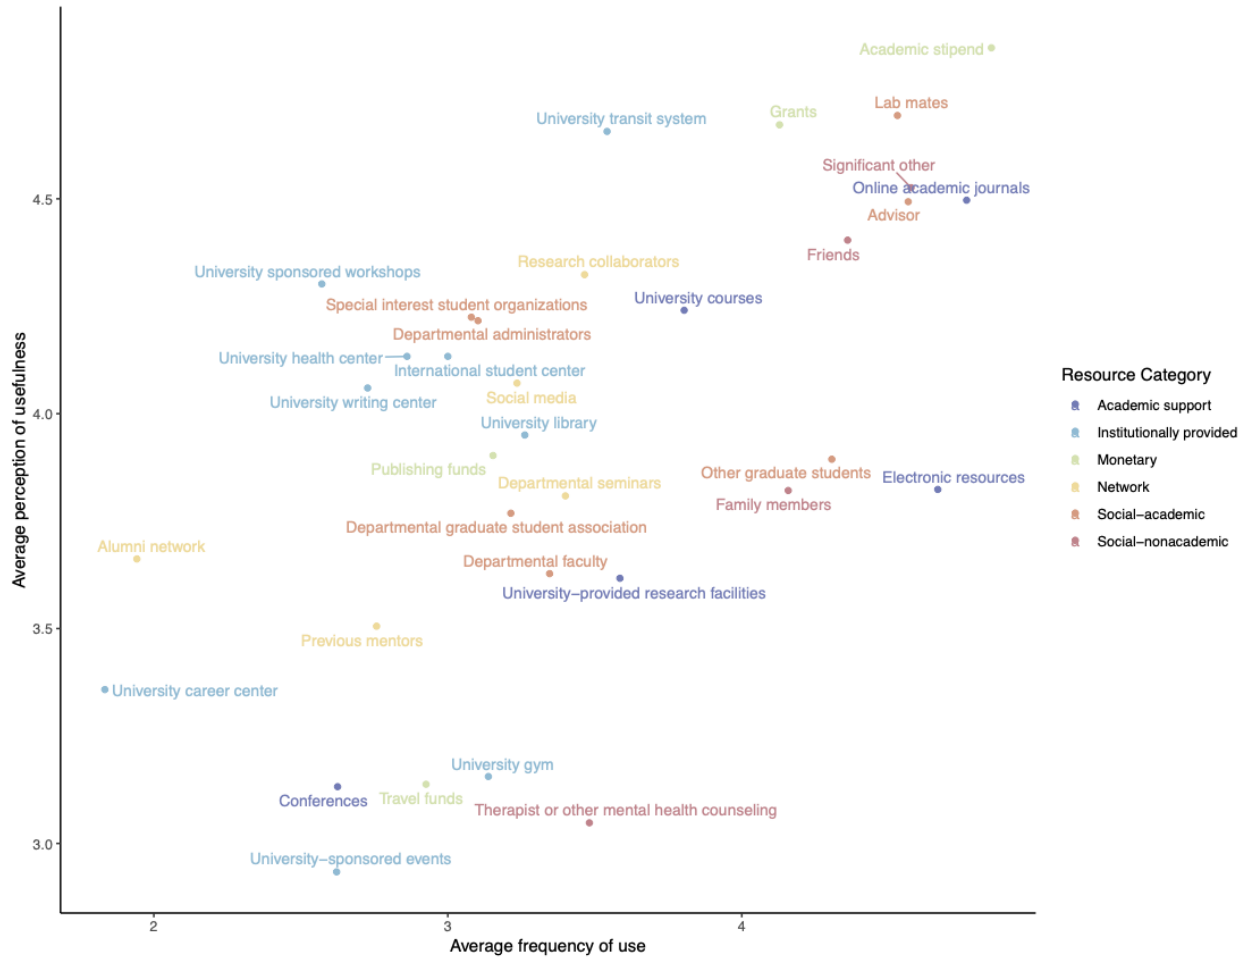

Supplementary Figure 2: Scatterplot of resource frequency of use by perception of resource usefulness

List of 107 universities surveyed:

- ALCORN
- AUBURN
- BAYLOR
- BERKLEY
- BOSTON UNIVERSITY
- BRIGHAM-YOUNG UNIVERSITY
- COLLEGE OF WILLIAM & MARY
- COLORADO STATE
- CORNELL
- CREIGHTON
- DARTMOUTH
- DREXEL
- DUKE

Demographics matter: Nonwhite and white life science graduate students perceive and use resources differently – Supplemental Material

DUQUESNE  
EAST CAROLINA UNIVERSITY  
FISK  
FLORIDA ATLANTIC  
FRESNO STATE  
GEORGE MASON  
GEORGE WASHINGTON  
HAMPTON  
HARVARD  
HOWARD  
IDAHO STATE  
INDIANA UNIVERSITY  
KENT STATE  
LOUISIANA STATE  
LOYOLA  
MARQUETTE UNIVERSITY  
MASSACHUSETTS INSTITUTE OF TECHNOLOGY  
MIAMI UNIVERSITY  
MICHIGAN TECHNOLOGICAL  
NEW MEXICO STATE  
NEW YORK UNIVERSITY  
NORTHEASTERN ILLINOIS  
NORTHERN ARIZONA  
PORTLAND STATE  
PRINCETON  
RICE  
ROCKEFELLER  
SAN JOSE STATE  
SCRIPPS COLLEGE  
SITTING BULL COLLEGE  
STANFORD  
TEXAS A&M  
TEXAS TECH  
TULANE  
UNIVERSITY AT BUFFALO  
UNIVERSITY OF ALABAMA  
UNIVERSITY OF ALASKA  
UNIVERSITY OF ARIZONA  
UNIVERSITY OF ARKANSAS  
UNIVERSITY OF CALIFORNIA - BAKERSFIELD

Demographics matter: Nonwhite and white life science graduate students perceive and use resources differently – Supplemental Material

UNIVERSITY OF CALIFORNIA - DAVIS  
UNIVERSITY OF CALIFORNIA - IRVINE  
UNIVERSITY OF CALIFORNIA - MERCED  
UNIVERSITY OF CALIFORNIA - RIVERSIDE  
UNIVERSITY OF CALIFORNIA - SAN FRANCISCO  
UNIVERSITY OF CALIFORNIA - SANTA BARBARA  
UNIVERSITY OF CENTRAL FLORIDA  
UNIVERSITY OF COLORADO  
UNIVERSITY OF CONNECTICUT  
UNIVERSITY OF DELEWARE  
UNIVERSITY OF FLORIDA  
UNIVERSITY OF GEORGIA  
UNIVERSITY OF HAWAII  
UNIVERSITY OF IDAHO  
UNIVERSITY OF ILLINOIS  
UNIVERSITY OF IOWA  
UNIVERSITY OF KANSAS  
UNIVERSITY OF KENTUCKY  
UNIVERSITY OF MARYLAND  
UNIVERSITY OF MASSACHUSETTS  
UNIVERSITY OF MIAMI  
UNIVERSITY OF MICHIGAN  
UNIVERSITY OF MINNESOTA  
UNIVERSITY OF MISSISSIPPI  
UNIVERSITY OF MISSOURI  
UNIVERSITY OF MONTANA  
UNIVERSITY OF NEBRASKA  
UNIVERSITY OF NEVADA  
UNIVERSITY OF NEW HAMPSHIRE  
UNIVERSITY OF NEW MEXICO  
UNIVERSITY OF NEW YORK - RUTGERS  
UNIVERSITY OF NORTH CAROLINA  
UNIVERSITY OF NORTH DAKOTA  
UNIVERSITY OF OKLAHOMA  
UNIVERSITY OF OREGON  
UNIVERSITY OF PENNSYLVANNIA  
UNIVERSITY OF PUERTO RICO - MAYAGUEZ  
UNIVERSITY OF PUERTO RICO - RIO PIEDRAS  
UNIVERSITY OF SOUTH CAROLINA  
UNIVERSITY OF SOUTH DAKOTA

Demographics matter: Nonwhite and white life science graduate students perceive and use resources differently – Supplemental Material

UNIVERSITY OF TEXAS - AUSTIN  
UNIVERSITY OF TEXAS - DALLAS  
UNIVERSITY OF TEXAS - SAN ANTONIO  
UNIVERSITY OF VERMONT  
UNIVERSITY OF VIRGINIA  
UNIVERSITY OF WASHINGTON  
UNIVERSITY OF WISCONSIN  
UNIVERSITY OF WYOMING  
UTAH STATE  
VILLANOVA  
VIRGINIA TECH  
WASHINGTON STATE  
WASHINGTON UNIVERSITY SAINT LOUIS  
WEST CAROLINA UNIVERSITY  
WEST VIRGINIA STATE

*List of unique resources written-in by survey participants:*

Childcare  
Computing Resources (Cloud-Computing, Super Computers)  
Departmental Social Events  
Disability Services  
Faculty Outside of Department  
Faith Community  
Fellowship Funding  
Field / Lab Technicians  
Field Equipment  
Field Stations / Field Sites  
Food Pantry  
Graduate Coordinator  
Graduate Student Union  
Green Spaces  
Healthcare  
Hobbies And Hobby-Related Resources  
Housing Services  
Income From Work Outside of Graduate School (I.E., Second Job)  
It Support  
Lab Space / Office Space  
Museum / Herbarium Collections  
Non-University Gym  
Non-University Transit Systems

Demographics matter: Nonwhite and white life science graduate students perceive and use resources differently – Supplemental Material

Ombudsperson  
Online Research Communities (E.G., Github, Reddit, Stackoverflow)  
Personal Laptop  
Personal Vehicle  
Post-Docs  
Project Management Software  
Statistical / Quantitative Consulting  
Study Spaces  
Undergraduates  
University Center for Teaching and Learning  
University Meal Plan  
University-Owned Vehicles  
University-Provided Software Subscriptions  
Veteran's Resource Office  
Volunteer Opportunities  
Webinars



Descriptive Statistics - Perception of resource usefulness

| <i>USEFUL Academic stipend</i> |            | <i>USEFUL Advisor</i> |            | <i>USEFUL Alumni network</i> |            | <i>USEFUL University career center</i> |            | <i>USEFUL Research collaborators</i> |            |
|--------------------------------|------------|-----------------------|------------|------------------------------|------------|----------------------------------------|------------|--------------------------------------|------------|
| Mean                           | 4.85064935 | Mean                  | 4.49323017 | Mean                         | 3.66197183 | Mean                                   | 3.13207547 | Mean                                 | 4.21428571 |
| Standard Error                 | 0.02174363 | Standard Error        | 0.04529115 | Standard Error               | 0.13448413 | Standard Error                         | 0.18475602 | Standard Error                       | 0.05051507 |
| Median                         | 5          | Median                | 5          | Median                       | 4          | Median                                 | 3          | Median                               | 5          |
| Mode                           | 5          | Mode                  | 5          | Mode                         | 5          | Mode                                   | 4          | Mode                                 | 5          |
| Standard Deviation             | 0.46736165 | Standard Deviation    | 1.02981362 | Standard Deviation           | 1.1331834  | Standard Deviation                     | 1.34504412 | Standard Deviation                   | 0.9821252  |
| Sample Variance                | 0.21842691 | Sample Variance       | 1.0605161  | Sample Variance              | 1.28410463 | Sample Variance                        | 1.80914369 | Sample Variance                      | 0.96456991 |
| Kurtosis                       | 17.5584251 | Kurtosis              | 3.7400646  | Kurtosis                     | -1.0926941 | Kurtosis                               | -1.1312394 | Kurtosis                             | 0.55921342 |
| Skewness                       | -3.806129  | Skewness              | -2.156831  | Skewness                     | -0.2637081 | Skewness                               | -0.1510938 | Skewness                             | -1.1329661 |
| Range                          | 4          | Range                 | 4          | Range                        | 4          | Range                                  | 4          | Range                                | 4          |
| Minimum                        | 1          | Minimum               | 1          | Minimum                      | 1          | Minimum                                | 1          | Minimum                              | 1          |
| Maximum                        | 5          | Maximum               | 5          | Maximum                      | 5          | Maximum                                | 5          | Maximum                              | 5          |
| Sum                            | 2241       | Sum                   | 2323       | Sum                          | 260        | Sum                                    | 166        | Sum                                  | 1593       |
| Count                          | 462        | Count                 | 517        | Count                        | 71         | Count                                  | 53         | Count                                | 378        |

Descriptive Statistics - Perception of resource usefulness

| <i>USEFUL Conferences</i> | <i>USEFUL University courses</i> | <i>USEFUL Departmental faculty</i> | <i>USEFUL Departmental administrators</i> | <i>USEFUL University health center</i> |            |                |            |                |            |
|---------------------------|----------------------------------|------------------------------------|-------------------------------------------|----------------------------------------|------------|----------------|------------|----------------|------------|
| Mean                      | 3.62849162                       | Mean                               | 3.76734694                                | Mean                                   | 3.81041667 | Mean           | 3.82958199 | Mean           | 3.82121212 |
| Standard Error            | 0.06074442                       | Standard Error                     | 0.04883679                                | Standard Error                         | 0.04471688 | Standard Error | 0.06294371 | Standard Error | 0.0623783  |
| Median                    | 4                                | Median                             | 4                                         | Median                                 | 4          | Median         | 4          | Median         | 4          |
| Mode                      | 4                                | Mode                               | 5                                         | Mode                                   | 4          | Mode           | 5          | Mode           | 5          |
| Standard Dev              | 1.14933836                       | Standard Dev                       | 1.08104845                                | Standard Dev                           | 0.97969779 | Standard Dev   | 1.11002448 | Standard Dev   | 1.13315805 |
| Sample Vari               | 1.32097867                       | Sample Vari                        | 1.16866575                                | Sample Vari                            | 0.95980776 | Sample Vari    | 1.23215434 | Sample Vari    | 1.28404716 |
| Kurtosis                  | -0.5575555                       | Kurtosis                           | -0.5564273                                | Kurtosis                               | -0.3199138 | Kurtosis       | -0.5157748 | Kurtosis       | -0.6037551 |
| Skewness                  | -0.4843251                       | Skewness                           | -0.5216567                                | Skewness                               | -0.5088711 | Skewness       | -0.5986183 | Skewness       | -0.5895851 |
| Range                     | 4                                | Range                              | 4                                         | Range                                  | 4          | Range          | 4          | Range          | 4          |
| Minimum                   | 1                                | Minimum                            | 1                                         | Minimum                                | 1          | Minimum        | 1          | Minimum        | 1          |
| Maximum                   | 5                                | Maximum                            | 5                                         | Maximum                                | 5          | Maximum        | 5          | Maximum        | 5          |
| Sum                       | 1299                             | Sum                                | 1846                                      | Sum                                    | 1829       | Sum            | 1191       | Sum            | 1261       |
| Count                     | 358                              | Count                              | 490                                       | Count                                  | 480        | Count          | 311        | Count          | 330        |

Descriptive Statistics - Perception of resource usefulness

|                    | <i>USEFUL University-<br/>provided research<br/>facilities (e.g., mass<br/>spectrometer, genomics<br/>equipment)</i> | <i>USEFUL Online academic<br/>journals</i> | <i>USEFUL International<br/>student center</i> | <i>USEFUL Grants</i>          | <i>USEFUL Lab mates</i>       |
|--------------------|----------------------------------------------------------------------------------------------------------------------|--------------------------------------------|------------------------------------------------|-------------------------------|-------------------------------|
| Mean               | 4.40506329                                                                                                           | Mean 4.67078189                            | Mean 4.13333333                                | Mean 4.69208211               | Mean 4.49892009               |
| Standard Error     | 0.04829335                                                                                                           | Standard Error 0.02937017                  | Standard Error 0.14958435                      | Standard Error 0.03507903     | Standard Error 0.03730903     |
| Median             | 5                                                                                                                    | Median 5                                   | Median 4                                       | Median 5                      | Median 5                      |
| Mode               | 5                                                                                                                    | Mode 5                                     | Mode 5                                         | Mode 5                        | Mode 5                        |
| Standard Deviation | 0.85848131                                                                                                           | Standard Deviation 0.64747743              | Standard Deviation 0.81930725                  | Standard Deviation 0.64777588 | Standard Deviation 0.80279471 |
| Sample Variance    | 0.73699015                                                                                                           | Sample Variance 0.41922702                 | Sample Variance 0.67126437                     | Sample Variance 0.41961359    | Sample Variance 0.64447935    |
| Kurtosis           | 2.3597295                                                                                                            | Kurtosis 4.25150297                        | Kurtosis -1.4571717                            | Kurtosis 3.488493             | Kurtosis 2.82024269           |
| Skewness           | -1.5507753                                                                                                           | Skewness -2.0734536                        | Skewness -0.2591565                            | Skewness -2.0816696           | Skewness -1.723369            |
| Range              | 4                                                                                                                    | Range 4                                    | Range 2                                        | Range 3                       | Range 4                       |
| Minimum            | 1                                                                                                                    | Minimum 1                                  | Minimum 3                                      | Minimum 2                     | Minimum 1                     |
| Maximum            | 5                                                                                                                    | Maximum 5                                  | Maximum 5                                      | Maximum 5                     | Maximum 5                     |
| Sum                | 1392                                                                                                                 | Sum 2270                                   | Sum 124                                        | Sum 1600                      | Sum 2083                      |
| Count              | 316                                                                                                                  | Count 486                                  | Count 30                                       | Count 341                     | Count 463                     |

Descriptive Statistics - Perception of resource usefulness

|                    | <i>USEFUL University library</i> | <i>USEFUL Departmental graduate student association</i> | <i>USEFUL Previous mentors</i> | <i>USEFUL Friends</i>         | <i>USEFUL Significant other</i> |
|--------------------|----------------------------------|---------------------------------------------------------|--------------------------------|-------------------------------|---------------------------------|
| Mean               | 3.89071038                       | Mean 3.50367647                                         | Mean 3.89849624                | Mean 4.32067511               | Mean 4.52312139                 |
| Standard Error     | 0.05878402                       | Standard Error 0.06988435                               | Standard Error 0.06439031      | Standard Error 0.0440609      | Standard Error 0.04811214       |
| Median             | 4                                | Median 3.5                                              | Median 4                       | Median 5                      | Median 5                        |
| Mode               | 5                                | Mode 3                                                  | Mode 5                         | Mode 5                        | Mode 5                          |
| Standard Deviation | 1.12460455                       | Standard Deviation 1.15256224                           | Standard Deviation 1.05017411  | Standard Deviation 0.95927362 | Standard Deviation 0.8949375    |
| Sample Variance    | 1.26473538                       | Sample Variance 1.32839972                              | Sample Variance 1.10286565     | Sample Variance 0.92020589    | Sample Variance 0.80091313      |
| Kurtosis           | -0.6016765                       | Kurtosis -0.9721879                                     | Kurtosis -0.7999301            | Kurtosis 1.29397022           | Kurtosis 3.21006757             |
| Skewness           | -0.643348                        | Skewness -0.1984148                                     | Skewness -0.5243512            | Skewness -1.3862479           | Skewness -1.9611969             |
| Range              | 4                                | Range 4                                                 | Range 4                        | Range 4                       | Range 4                         |
| Minimum            | 1                                | Minimum 1                                               | Minimum 1                      | Minimum 1                     | Minimum 1                       |
| Maximum            | 5                                | Maximum 5                                               | Maximum 5                      | Maximum 5                     | Maximum 5                       |
| Sum                | 1424                             | Sum 953                                                 | Sum 1037                       | Sum 2048                      | Sum 1565                        |
| Count              | 366                              | Count 272                                               | Count 266                      | Count 474                     | Count 346                       |

Descriptive Statistics - Perception of resource usefulness

---

| <i>USEFUL Family members</i> | <i>USEFUL Publishing funds</i> | <i>USEFUL Departmental seminars</i> | <i>USEFUL Social media</i> | <i>USEFUL University writing center</i> |            |                |            |                |            |
|------------------------------|--------------------------------|-------------------------------------|----------------------------|-----------------------------------------|------------|----------------|------------|----------------|------------|
| Mean                         | 4.06837607                     | Mean                                | 4.20833333                 | Mean                                    | 3.05316456 | Mean           | 3.13768116 | Mean           | 3.35802469 |
| Standard Error               | 0.06094888                     | Standard Error                      | 0.14874872                 | Standard Error                          | 0.05878919 | Standard Error | 0.07637782 | Standard Error | 0.13415101 |
| Median                       | 5                              | Median                              | 5                          | Median                                  | 3          | Median         | 3          | Median         | 3          |
| Mode                         | 5                              | Mode                                | 5                          | Mode                                    | 3          | Mode           | 3          | Mode           | 3          |
| Standard Dev                 | 1.14187687                     | Standard Dev                        | 1.03056137                 | Standard Dev                            | 1.16841203 | Standard Dev   | 1.26888371 | Standard Dev   | 1.20735912 |
| Sample Vari                  | 1.30388278                     | Sample Vari                         | 1.06205674                 | Sample Vari                             | 1.36518666 | Sample Vari    | 1.61006588 | Sample Vari    | 1.45771605 |
| Kurtosis                     | -0.2770714                     | Kurtosis                            | -0.1593772                 | Kurtosis                                | -0.7651804 | Kurtosis       | -1.0385701 | Kurtosis       | -0.8291877 |
| Skewness                     | -0.9220047                     | Skewness                            | -1.0473274                 | Skewness                                | 0.09779761 | Skewness       | 0.00788379 | Skewness       | -0.2473949 |
| Range                        | 4                              | Range                               | 3                          | Range                                   | 4          | Range          | 4          | Range          | 4          |
| Minimum                      | 1                              | Minimum                             | 2                          | Minimum                                 | 1          | Minimum        | 1          | Minimum        | 1          |
| Maximum                      | 5                              | Maximum                             | 5                          | Maximum                                 | 5          | Maximum        | 5          | Maximum        | 5          |
| Sum                          | 1428                           | Sum                                 | 202                        | Sum                                     | 1206       | Sum            | 866        | Sum            | 272        |
| Count                        | 351                            | Count                               | 48                         | Count                                   | 395        | Count          | 276        | Count          | 81         |

---

Descriptive Statistics - Perception of resource usefulness

|                    | <i>USEFUL Therapist or<br/>other mental health<br/>counseling</i> | <i>USEFUL University<br/>sponsored workshops</i> | <i>USEFUL Travel funds</i>    | <i>USEFUL University gym</i>  | <i>USEFUL Other graduate<br/>students</i> |
|--------------------|-------------------------------------------------------------------|--------------------------------------------------|-------------------------------|-------------------------------|-------------------------------------------|
| Mean               | 4.24166667                                                        | Mean 3.14646465                                  | Mean 4.1291866                | Mean 3.95020747               | Mean 4.30322581                           |
| Standard Error     | 0.06548597                                                        | Standard Error 0.07209704                        | Standard Error 0.07105985     | Standard Error 0.06850035     | Standard Error 0.04029031                 |
| Median             | 5                                                                 | Median 3                                         | Median 4                      | Median 4                      | Median 5                                  |
| Mode               | 5                                                                 | Mode 3                                           | Mode 5                        | Mode 5                        | Mode 5                                    |
| Standard Deviation | 1.0145043                                                         | Standard Deviation 1.01449526                    | Standard Deviation 1.02730033 | Standard Deviation 1.06341135 | Standard Deviation 0.86881454             |
| Sample Variance    | 1.02921897                                                        | Sample Variance 1.02920064                       | Sample Variance 1.05534597    | Sample Variance 1.13084371    | Sample Variance 0.75483871                |
| Kurtosis           | 1.01223642                                                        | Kurtosis -0.4490032                              | Kurtosis -0.1930739           | Kurtosis -0.431295            | Kurtosis 1.12654309                       |
| Skewness           | -1.3000495                                                        | Skewness 0.02597891                              | Skewness -0.9067721           | Skewness -0.6967739           | Skewness -1.2032587                       |
| Range              | 4                                                                 | Range 4                                          | Range 4                       | Range 4                       | Range 4                                   |
| Minimum            | 1                                                                 | Minimum 1                                        | Minimum 1                     | Minimum 1                     | Minimum 1                                 |
| Maximum            | 5                                                                 | Maximum 5                                        | Maximum 5                     | Maximum 5                     | Maximum 5                                 |
| Sum                | 1018                                                              | Sum 623                                          | Sum 863                       | Sum 952                       | Sum 2001                                  |
| Count              | 240                                                               | Count 198                                        | Count 209                     | Count 241                     | Count 465                                 |

Descriptive Statistics - Perception of resource usefulness

|                    | <i>USEFUL Electronic resources (e.g., specific research software, R, mendeley)</i> | <i>USEFUL University transit system</i> | <i>USEFUL Special interest student organizations</i> | <i>USEFUL University-sponsored events</i> |
|--------------------|------------------------------------------------------------------------------------|-----------------------------------------|------------------------------------------------------|-------------------------------------------|
| Mean               | 4.65531915                                                                         | Mean 4.05978261                         | Mean 3.61702128                                      | Mean 2.9338843                            |
| Standard Error     | 0.03116991                                                                         | Standard Error 0.08125997               | Standard Error 0.08870313                            | Standard Error 0.07418177                 |
| Median             | 5                                                                                  | Median 4                                | Median 4                                             | Median 3                                  |
| Mode               | 5                                                                                  | Mode 5                                  | Mode 3                                               | Mode 3                                    |
| Standard Deviation | 0.67574756                                                                         | Standard Deviation 1.10226392           | Standard Deviation 1.05329127                        | Standard Deviation 1.15399747             |
| Sample Variance    | 0.45663476                                                                         | Sample Variance 1.21498574              | Sample Variance 1.10942249                           | Sample Variance 1.33171016                |
| Kurtosis           | 5.85368298                                                                         | Kurtosis 0.16085294                     | Kurtosis -0.8671598                                  | Kurtosis -0.7280142                       |
| Skewness           | -2.2851733                                                                         | Skewness -0.9855614                     | Skewness -0.1837094                                  | Skewness 0.26062195                       |
| Range              | 4                                                                                  | Range 4                                 | Range 4                                              | Range 4                                   |
| Minimum            | 1                                                                                  | Minimum 1                               | Minimum 1                                            | Minimum 1                                 |
| Maximum            | 5                                                                                  | Maximum 5                               | Maximum 5                                            | Maximum 5                                 |
| Sum                | 2188                                                                               | Sum 747                                 | Sum 510                                              | Sum 710                                   |
| Count              | 470                                                                                | Count 184                               | Count 141                                            | Count 242                                 |

| <i>FRQAcademic stipend</i> |            | <i>FRQAdvisor</i> |            | <i>FRQAlumni network</i> |            | <i>FRQUniversity career center</i> |            | <i>FRQResearch collaborators</i> |            |
|----------------------------|------------|-------------------|------------|--------------------------|------------|------------------------------------|------------|----------------------------------|------------|
| Mean                       | 4.72885033 | Mean              | 4.40116279 | Mean                     | 2          | Mean                               | 1.88679245 | Mean                             | 3.30585106 |
| Standard Error             | 0.03441117 | Standard Error    | 0.04328809 | Standard Error           | 0.13029668 | Standard Error                     | 0.13646049 | Standard Error                   | 0.05660784 |
| Median                     | 5          | Median            | 5          | Median                   | 2          | Median                             | 2          | Median                           | 3          |
| Mode                       | 5          | Mode              | 5          | Mode                     | 1          | Mode                               | 1          | Mode                             | 3          |
| Standard Dev               | 0.73883912 | Standard Dev      | 0.98331646 | Standard Dev             | 1.09014026 | Standard Dev                       | 0.99344733 | Standard Dev                     | 1.09766677 |
| Sample Vari                | 0.54588324 | Sample Vari       | 0.96691127 | Sample Vari              | 1.1884058  | Sample Vari                        | 0.98693759 | Sample Vari                      | 1.20487234 |
| Kurtosis                   | 8.80131756 | Kurtosis          | 2.5226001  | Kurtosis                 | 0.20089243 | Kurtosis                           | 0.4873802  | Kurtosis                         | -0.6595534 |
| Skewness                   | -2.9966479 | Skewness          | -1.7705679 | Skewness                 | 0.96732448 | Skewness                           | 0.96832609 | Skewness                         | -0.1668967 |
| Range                      | 4          | Range             | 4          | Range                    | 4          | Range                              | 4          | Range                            | 4          |
| Minimum                    | 1          | Minimum           | 1          | Minimum                  | 1          | Minimum                            | 1          | Minimum                          | 1          |
| Maximum                    | 5          | Maximum           | 5          | Maximum                  | 5          | Maximum                            | 5          | Maximum                          | 5          |
| Sum                        | 2180       | Sum               | 2271       | Sum                      | 140        | Sum                                | 100        | Sum                              | 1243       |
| Count                      | 461        | Count             | 516        | Count                    | 70         | Count                              | 53         | Count                            | 376        |



| <i>FRQConferences</i> | <i>FRQUniversity courses</i> | <i>FRQDepartmental faculty</i> | <i>FRQDepartmental administrators</i> | <i>FRQUniversity health center</i> |            |                |            |                |            |
|-----------------------|------------------------------|--------------------------------|---------------------------------------|------------------------------------|------------|----------------|------------|----------------|------------|
| Mean                  | 2.24791086                   | Mean                           | 3.73061224                            | Mean                               | 3.17118998 | Mean           | 2.81290323 | Mean           | 2.71212121 |
| Standard Error        | 0.05613121                   | Standard Error                 | 0.05218168                            | Standard Error                     | 0.05144476 | Standard Error | 0.06207838 | Standard Error | 0.07010903 |
| Median                | 2                            | Median                         | 4                                     | Median                             | 3          | Median         | 3          | Median         | 3          |
| Mode                  | 2                            | Mode                           | 5                                     | Mode                               | 3          | Mode           | 3          | Mode           | 3          |
| Standard Dev          | 1.06353465                   | Standard Dev                   | 1.15509082                            | Standard Dev                       | 1.12592354 | Standard Dev   | 1.09300273 | Standard Dev   | 1.27359377 |
| Sample Vari           | 1.13110596                   | Sample Vari                    | 1.3342348                             | Sample Vari                        | 1.26770381 | Sample Vari    | 1.19465497 | Sample Vari    | 1.62204108 |
| Kurtosis              | -0.3391117                   | Kurtosis                       | -0.7460829                            | Kurtosis                           | -0.7471002 | Kurtosis       | -0.681686  | Kurtosis       | -0.9883813 |
| Skewness              | 0.54257641                   | Skewness                       | -0.4838331                            | Skewness                           | 0.00352187 | Skewness       | 0.1377722  | Skewness       | 0.21576034 |
| Range                 | 4                            | Range                          | 4                                     | Range                              | 4          | Range          | 4          | Range          | 4          |
| Minimum               | 1                            | Minimum                        | 1                                     | Minimum                            | 1          | Minimum        | 1          | Minimum        | 1          |
| Maximum               | 5                            | Maximum                        | 5                                     | Maximum                            | 5          | Maximum        | 5          | Maximum        | 5          |
| Sum                   | 807                          | Sum                            | 1828                                  | Sum                                | 1519       | Sum            | 872        | Sum            | 895        |
| Count                 | 359                          | Count                          | 490                                   | Count                              | 479        | Count          | 310        | Count          | 330        |

| <i>FRQUniversity-provided<br/>research facilities (e.g.,<br/>mass spectrometer,<br/>genomics equipment)</i> |            | <i>FRQOnline academic<br/>journals</i> |            | <i>FRQInternational<br/>student center</i> |            | <i>FRQGrants</i> |            | <i>FRQLab mates</i> |            |
|-------------------------------------------------------------------------------------------------------------|------------|----------------------------------------|------------|--------------------------------------------|------------|------------------|------------|---------------------|------------|
| Mean                                                                                                        | 3.40822785 | Mean                                   | 4.64742268 | Mean                                       | 2.9        | Mean             | 3.88856305 | Mean                | 4.28663793 |
| Standard Error                                                                                              | 0.07160286 | Standard Error                         | 0.03080177 | Standard Error                             | 0.2215411  | Standard Error   | 0.0603141  | Standard Error      | 0.04591353 |
| Median                                                                                                      | 4          | Median                                 | 5          | Median                                     | 3          | Median           | 4          | Median              | 5          |
| Mode                                                                                                        | 5          | Mode                                   | 5          | Mode                                       | 2          | Mode             | 5          | Mode                | 5          |
| Standard Dev                                                                                                | 1.27284035 | Standard Dev                           | 0.67833851 | Standard Dev                               | 1.21343059 | Standard Dev     | 1.11377128 | Standard Dev        | 0.98900779 |
| Sample Vari                                                                                                 | 1.62012256 | Sample Vari                            | 0.46014314 | Sample Vari                                | 1.47241379 | Sample Vari      | 1.24048646 | Sample Vari         | 0.9781364  |
| Kurtosis                                                                                                    | -0.9902227 | Kurtosis                               | 4.44546239 | Kurtosis                                   | -0.8725453 | Kurtosis         | -0.5804461 | Kurtosis            | 1.00231078 |
| Skewness                                                                                                    | -0.3090797 | Skewness                               | -2.1015461 | Skewness                                   | 0.07940569 | Skewness         | -0.6392517 | Skewness            | -1.3260193 |
| Range                                                                                                       | 4          | Range                                  | 4          | Range                                      | 4          | Range            | 4          | Range               | 4          |
| Minimum                                                                                                     | 1          | Minimum                                | 1          | Minimum                                    | 1          | Minimum          | 1          | Minimum             | 1          |
| Maximum                                                                                                     | 5          | Maximum                                | 5          | Maximum                                    | 5          | Maximum          | 5          | Maximum             | 5          |
| Sum                                                                                                         | 1077       | Sum                                    | 2254       | Sum                                        | 87         | Sum              | 1326       | Sum                 | 1989       |
| Count                                                                                                       | 316        | Count                                  | 485        | Count                                      | 30         | Count            | 341        | Count               | 464        |

|                | <i>FRQDepartmental<br/>graduate student<br/>association</i> |                | <i>FRQPrevious mentors</i> |                | <i>FRQFriends</i> |                | <i>FRQSignificant other</i> |                |            |
|----------------|-------------------------------------------------------------|----------------|----------------------------|----------------|-------------------|----------------|-----------------------------|----------------|------------|
|                | <i>FRQUniversity library</i>                                |                |                            |                |                   |                |                             |                |            |
| Mean           | 3.07084469                                                  | Mean           | 3.00367647                 | Mean           | 2.72075472        | Mean           | 4.13559322                  | Mean           | 4.44219653 |
| Standard Error | 0.06860239                                                  | Standard Error | 0.06578452                 | Standard Error | 0.07146829        | Standard Error | 0.04970866                  | Standard Error | 0.05300266 |
| Median         | 3                                                           | Median         | 3                          | Median         | 3                 | Median         | 5                           | Median         | 5          |
| Mode           | 3                                                           | Mode           | 3                          | Mode           | 2                 | Mode           | 5                           | Mode           | 5          |
| Standard Dev   | 1.31423276                                                  | Standard Dev   | 1.08494618                 | Standard Dev   | 1.16341948        | Standard Dev   | 1.07994853                  | Standard Dev   | 0.98590638 |
| Sample Vari    | 1.72720775                                                  | Sample Vari    | 1.1771082                  | Sample Vari    | 1.35354488        | Sample Vari    | 1.16628882                  | Sample Vari    | 0.97201139 |
| Kurtosis       | -1.1113675                                                  | Kurtosis       | -0.5980165                 | Kurtosis       | -0.7386503        | Kurtosis       | 0.31322746                  | Kurtosis       | 3.08835553 |
| Skewness       | 0.05024281                                                  | Skewness       | 0.09745813                 | Skewness       | 0.31295523        | Skewness       | -1.094636                   | Skewness       | -1.9098521 |
| Range          | 4                                                           | Range          | 4                          | Range          | 4                 | Range          | 4                           | Range          | 4          |
| Minimum        | 1                                                           | Minimum        | 1                          | Minimum        | 1                 | Minimum        | 1                           | Minimum        | 1          |
| Maximum        | 5                                                           | Maximum        | 5                          | Maximum        | 5                 | Maximum        | 5                           | Maximum        | 5          |
| Sum            | 1127                                                        | Sum            | 817                        | Sum            | 721               | Sum            | 1952                        | Sum            | 1537       |
| Count          | 367                                                         | Count          | 272                        | Count          | 265               | Count          | 472                         | Count          | 346        |

| <i>FRQFamily members</i> | <i>FRQPublishing funds</i> | <i>FRQDepartmental seminars</i> | <i>FRQSocial media</i> | <i>FRQUniversity writing center</i> |            |                |            |                |            |
|--------------------------|----------------------------|---------------------------------|------------------------|-------------------------------------|------------|----------------|------------|----------------|------------|
| Mean                     | 3.81355932                 | Mean                            | 2.60416667             | Mean                                | 3.30788804 | Mean           | 3.40727273 | Mean           | 2.2962963  |
| Standard Error           | 0.06221524                 | Standard Error                  | 0.17036565             | Standard Error                      | 0.05841824 | Standard Error | 0.07679595 | Standard Error | 0.13081469 |
| Median                   | 4                          | Median                          | 2                      | Median                              | 3          | Median         | 3          | Median         | 2          |
| Mode                     | 5                          | Mode                            | 2                      | Mode                                | 3          | Mode           | 3          | Mode           | 2          |
| Standard Dev             | 1.17057275                 | Standard Dev                    | 1.18032782             | Standard Dev                        | 1.15809655 | Standard Dev   | 1.27351668 | Standard Dev   | 1.1773322  |
| Sample Vari              | 1.37024055                 | Sample Vari                     | 1.39317376             | Sample Vari                         | 1.34118762 | Sample Vari    | 1.62184472 | Sample Vari    | 1.38611111 |
| Kurtosis                 | -0.3906301                 | Kurtosis                        | -0.7725283             | Kurtosis                            | -0.8475171 | Kurtosis       | -0.987424  | Kurtosis       | -0.2292873 |
| Skewness                 | -0.7089942                 | Skewness                        | 0.34743742             | Skewness                            | -0.1156924 | Skewness       | -0.2341259 | Skewness       | 0.76435612 |
| Range                    | 4                          | Range                           | 4                      | Range                               | 4          | Range          | 4          | Range          | 4          |
| Minimum                  | 1                          | Minimum                         | 1                      | Minimum                             | 1          | Minimum        | 1          | Minimum        | 1          |
| Maximum                  | 5                          | Maximum                         | 5                      | Maximum                             | 5          | Maximum        | 5          | Maximum        | 5          |
| Sum                      | 1350                       | Sum                             | 125                    | Sum                                 | 1300       | Sum            | 937        | Sum            | 186        |
| Count                    | 354                        | Count                           | 48                     | Count                               | 393        | Count          | 275        | Count          | 81         |

|                | <i>FRQTherapist or other<br/>mental health counseling</i> | <i>FRQUniversity sponsored<br/>workshops</i> | <i>FRQTravel funds</i>    | <i>FRQUniversity gym</i>  | <i>FRQOther graduate<br/>students</i> |
|----------------|-----------------------------------------------------------|----------------------------------------------|---------------------------|---------------------------|---------------------------------------|
| Mean           | 3.42259414                                                | Mean 2.44162437                              | Mean 2.39712919           | Mean 3.0125               | Mean 4.02575107                       |
| Standard Error | 0.08575626                                                | Standard Error 0.07794408                    | Standard Error 0.07584002 | Standard Error 0.08587097 | Standard Error 0.04821283             |
| Median         | 4                                                         | Median 2                                     | Median 2                  | Median 3                  | Median 4                              |
| Mode           | 5                                                         | Mode 2                                       | Mode 2                    | Mode 3                    | Mode 5                                |
| Standard Dev   | 1.32575964                                                | Standard Dev 1.09399726                      | Standard Dev 1.09640645   | Standard Dev 1.33030732   | Standard Dev 1.04077203               |
| Sample Vari    | 1.75763862                                                | Sample Vari 1.19683                          | Sample Vari 1.2021071     | Sample Vari 1.76971757    | Sample Vari 1.08320642                |
| Kurtosis       | -1.0896902                                                | Kurtosis -0.6021477                          | Kurtosis -0.5147109       | Kurtosis -1.0991076       | Kurtosis 0.256328                     |
| Skewness       | -0.3225274                                                | Skewness 0.42218696                          | Skewness 0.44202032       | Skewness 0.11673949       | Skewness -0.936668                    |
| Range          | 4                                                         | Range 4                                      | Range 4                   | Range 4                   | Range 4                               |
| Minimum        | 1                                                         | Minimum 1                                    | Minimum 1                 | Minimum 1                 | Minimum 1                             |
| Maximum        | 5                                                         | Maximum 5                                    | Maximum 5                 | Maximum 5                 | Maximum 5                             |
| Sum            | 818                                                       | Sum 481                                      | Sum 501                   | Sum 723                   | Sum 1876                              |
| Count          | 239                                                       | Count 197                                    | Count 209                 | Count 240                 | Count 466                             |

---

*FRQElectronic resources*  
(e.g., specific research  
software, R, mendeley)

*FRQUniversity transit  
system*

*FRQSpecial interest  
student organizations*

*FRQUniversity-  
sponsored events*

---

|                |            |                |            |                |            |                |            |
|----------------|------------|----------------|------------|----------------|------------|----------------|------------|
| Mean           | 4.46170213 | Mean           | 3.22702703 | Mean           | 3.12765957 | Mean           | 2.40909091 |
| Standard Error | 0.04068163 | Standard Error | 0.11113992 | Standard Error | 0.10208121 | Standard Error | 0.0693506  |
| Median         | 5          | Median         | 3          | Median         | 3          | Median         | 2          |
| Mode           | 5          | Mode           | 5          | Mode           | 3          | Mode           | 2          |
| Standard Dev   | 0.88195683 | Standard Dev   | 1.51166634 | Standard Dev   | 1.21214723 | Standard Dev   | 1.07884216 |
| Sample Vari    | 0.77784784 | Sample Vari    | 2.28513514 | Sample Vari    | 1.46930091 | Sample Vari    | 1.16390041 |
| Kurtosis       | 2.66312543 | Kurtosis       | -1.4614202 | Kurtosis       | -0.818765  | Kurtosis       | -0.3568174 |
| Skewness       | -1.7559227 | Skewness       | -0.1917121 | Skewness       | -0.0531841 | Skewness       | 0.52707196 |
| Range          | 4          | Range          | 4          | Range          | 4          | Range          | 4          |
| Minimum        | 1          | Minimum        | 1          | Minimum        | 1          | Minimum        | 1          |
| Maximum        | 5          | Maximum        | 5          | Maximum        | 5          | Maximum        | 5          |
| Sum            | 2097       | Sum            | 597        | Sum            | 441        | Sum            | 583        |
| Count          | 470        | Count          | 185        | Count          | 141        | Count          | 242        |

---
